# Supplementary material
Source: publisher site journal article supplement (https://www.spandidos-publications.com/7186/downloadSupplementary)

Figure S1. Representative percent gated of lymphocytes populations on PBMC after CM treatment. Lymphocytes classes (CD8<sup>+</sup>, NK, CD4<sup>+</sup>, NKT, CD4<sup>+</sup>HLA-DR<sup>+</sup>, CD8<sup>+</sup>HLA-DR<sup>+</sup>, NK HLA-DR<sup>+</sup> and NK-T) were not increased after PBMC stimulation for 24 h with BC (MCF-10A, MCF-7, BT-474, SK-BR-3 and MDA-MB-231) CM. White bars, untreated PBMCs; black bars, PBMCs treated with MCF-10A CM; red bars, PBMCs treated with MCF-7 CM; blue bars, PBMCs treated with BT-474 CM; grey bars, PBMCs treated with MDA-231 CM. CM, conditioned medium; PBMCs, peripheral blood mononuclear cells.

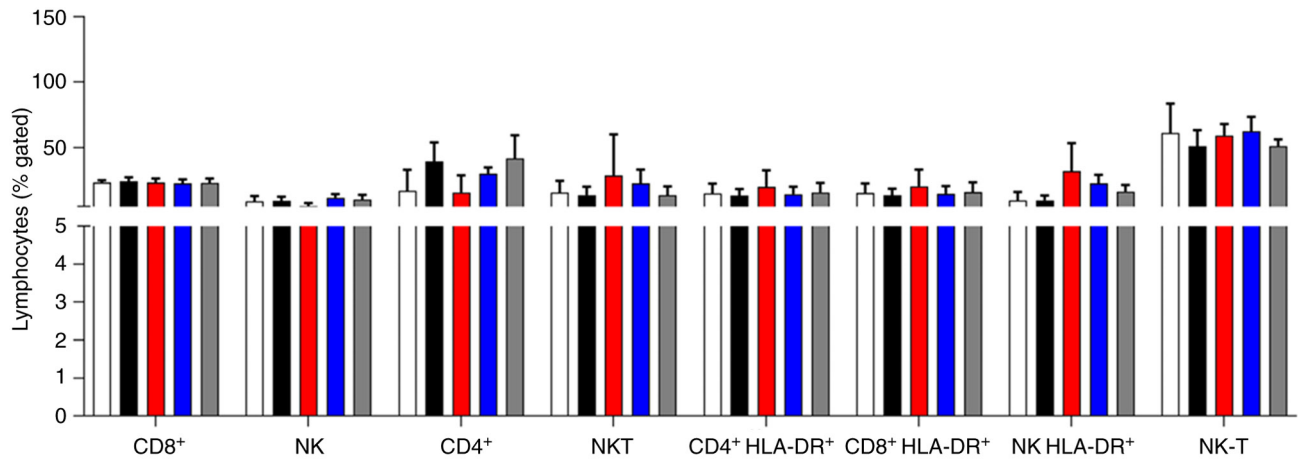

Figure S2. Representative percent gated of classical monocytes in PBMC after CM treatment. Monocytes CD14<sup>+</sup> were not increased after PBMC stimulation for 24 h with BC (MCF-10A, MCF-7, BT-474, SK-BR-3 and MDA-MB-231) CM. CM, conditioned medium; PBMCs, peripheral blood mononuclear cells.

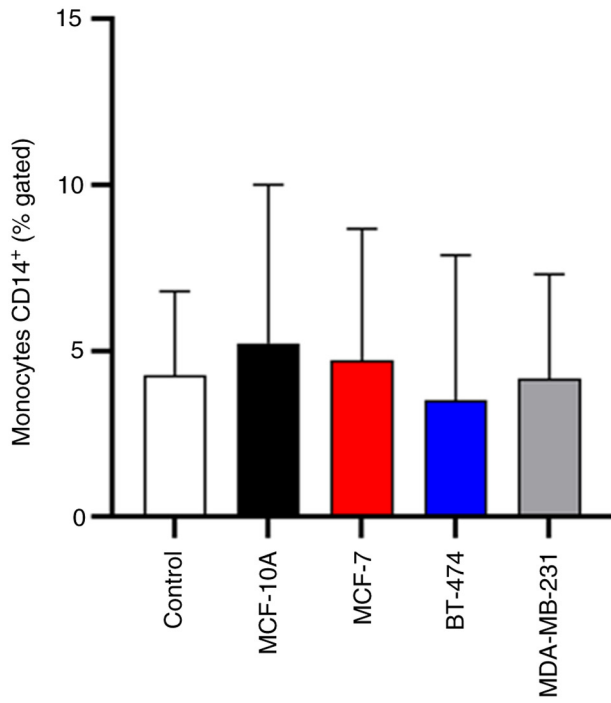

Figure S3. Representative gating strategy of the identified blood population cells. (A) Doublet exclusion. (B) Live cells. (C) CD45<sup>+</sup> cells. (D) T-lymphocytes identified as CD3<sup>+</sup>/CD25<sup>+</sup> cells. (E) T-reg cells identified as CD3<sup>+</sup>/CD25<sup>+</sup> cells. (F) Inside the CD45<sup>+</sup> cells we identified different monocytes population as CD14<sup>+</sup>/CD16<sup>-</sup> cells (classical monocytes) and CD14<sup>+</sup>/CD16<sup>+</sup> cells (rare monocytes).

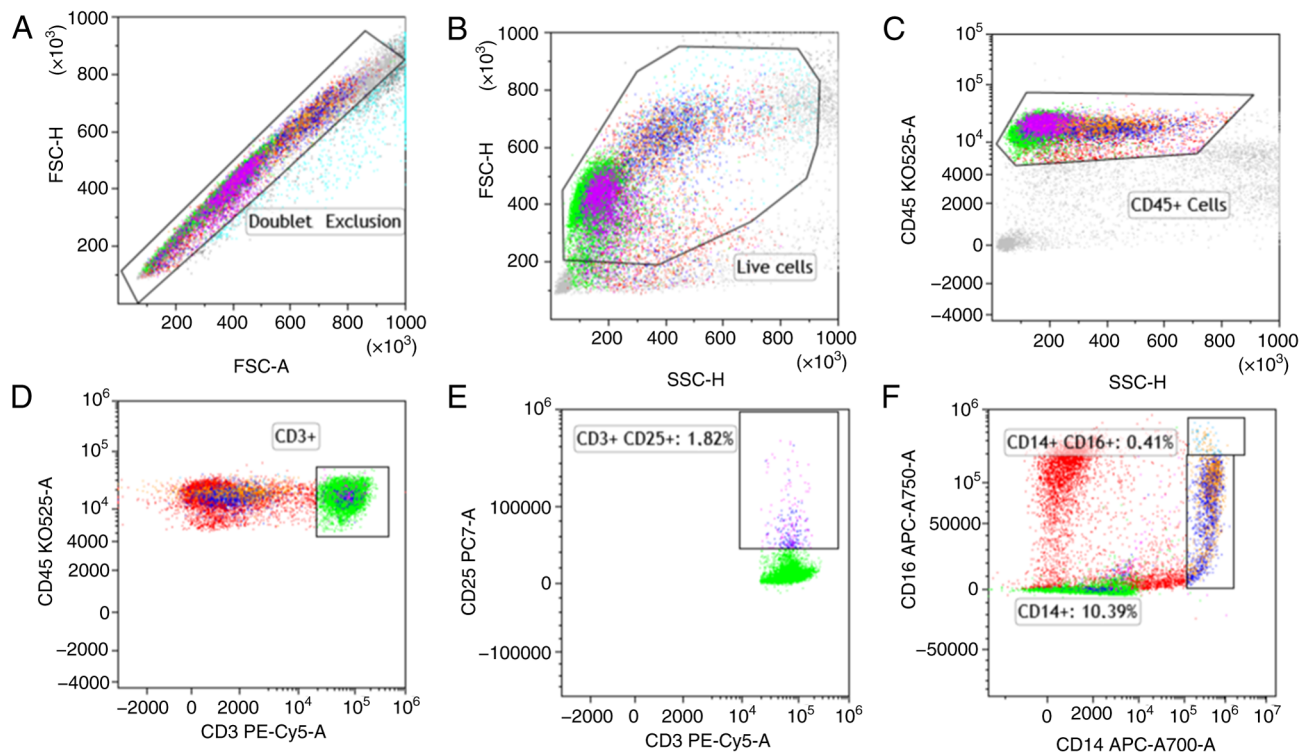

Supplement: Supplementary file 1 [file downloadSupplementary]
